# Supplementary material for: Genetic structure of Hancornia speciosa Gomes (Apocynaceae) in the cerraro and atlantic forest domains reveal two botanical varieties
Source: Research Square preprint supplement (doi:10.21203/rs.3.rs-1719926/v1), 2022-06-10
Supplement: Supplementary file 1 [file c7be76104a22f3f61b0dadb1.docx]

**Table S1** Position sites for SNPs and indels for the *trn*H-*psb*A intergenic spacer. Ft represent frequency of the haplotype.

| Haplótipos |  | Posição | | | | | | | | | |  |  |
| --- | --- | --- | --- | --- | --- | --- | --- | --- | --- | --- | --- | --- | --- |
| 25 | 55 | 66 | 67 | 80 | 111 | 134 | 137 | 206 | 256 | 391 | *Ft*. | var. |
| H1 | A | G | - | T | - | A | T | T | A | A | C | 15 | *pubescens* |
| H2 | A | T | - | A | - | A | T | T | A | A | - | 1 | *gardneri* |
| H3 | A | T | - | A | - | A | T | T | A | A | C | 34 | *gardneri* |
| H4 | A | T | - | A | T | A | A | G | C | A | C | 1 | *speciosa* |
| H5 | A | T | - | A | T | A | T | G | C | A | C | 52 | *speciosa* |
| H6 | A | T | - | A | T | A | T | G | C | T | C | 1 | *speciosa* |
| H7 | A | T | - | A | T | T | T | G | C | A | C | 1 | *speciosa* |
| H8 | A | T | - | A | - | A | T | T | A | A | C | 8 | *cuyabensis* |
| H9 | A | T | T | - | - | A | T | T | A | A | C | 19 | *gardneri* |
| H10 | A | T | - | T | T | A | T | G | C | A | C | 18 | *speciosa* |
| H11 | G | T | - | T | T | A | T | G | C | A | C | 1 | *speciosa* |
