# Supplementary material for: Genetic structure of Hancornia speciosa Gomes (Apocynaceae) in the cerraro and atlantic forest domains reveal two botanical varieties
Source: Research Square preprint supplement (doi:10.21203/rs.3.rs-1719926/v1), 2022-06-10
Supplement: Supplementary file 2 [file eef815a654c2470b824300ef.docx]

**Table S2.** *Loci* described by Rodrigues et al. (2015) utilized in the study. Allesl size (bp), numbers allele, observed heterozygosity Ho and expected heterozygosity.

| *Loci* |  | Alleles size | N. alleles | Ho | He |
| --- | --- | --- | --- | --- | --- |
| HS01 |  | 250-310 | 41 | 0.68 | 0.91 |
| HS09 |  | 200-300 | 26 | 0.47 | 0.77 |
| HS10 |  | 100-200 | 15 | 0.34 | 0.66 |
| HS13 |  | 100-150 | 13 | 0.57 | 0.81 |
| HS16 |  | 100-150 | 29 | 0.78 | 0.82 |
| HS20 |  | 200-250 | 14 | 0.79 | 0.75 |
| Total |  | - | 138 |  |  |
